# Supplementary material for: A Pilot Study of Cardiac MRI in Breast Cancer Survivors After Cardiotoxic Chemotherapy and Three-Dimensional Conformal Radiotherapy
Source: PubMed Central journal article supplement (PMC7596658; doi:10.3389/fonc.2020.506739), 2020-10-16
Supplement: Table_1.pdf [file Table_1.pdf]

**Supplemental Table 1. Patient Cardiac MRI Parameters**

| Patient Number              | 1     | 2     | 3     | 4     | 5     | 6     | 7     | 8     | 9     | 10    | 11    | 12    | 13    | 14    | 15    | 16    | 17    | 18    | 19    | 20    |
|-----------------------------|-------|-------|-------|-------|-------|-------|-------|-------|-------|-------|-------|-------|-------|-------|-------|-------|-------|-------|-------|-------|
| Mean heart dose (cGy)       | 551   | 924   | 465   | 184   | 683   | 168   | 342   | 344   | 709   | 554   | 458   | 788   | 480   | 1115  | 105   | 2     | 51    | 79    | 61    | 99    |
| Max heart dose (cGy)        | 5205  | 5435  | 5195  | 5065  | 5345  | 5085  | 4950  | 5185  | 5125  | 5315  | 5205  | 5035  | 5425  | 5156  | 1145  | 24    | 321   | 377   | 635   | 607   |
| V5-Whole heart (cGy)        | 37    | 57    | 16    | 6     | 34    | 3     | 12    | 11    | 21    | 15    | 14    | 29    | 20    | 64    | 0     | 0     | 0     | 0     | 0     | 0     |
| V10-Whole heart (cGy)       | 14    | 33    | 10    | 4     | 22    | 1     | 7     | 8     | 16    | 10    | 10    | 22    | 9     | 50    | 0     | 0     | 0     | 0     | 0     | 0     |
| V25-Whole heart (cGy)       | 3     | 8     | 6     | 2     | 8     | 1     | 3     | 4     | 12    | 7     | 6     | 11    | 4     | 10    | 0     | 0     | 0     | 0     | 0     | 0     |
| V45-Whole heart (cGy)       | 0     | 2     | 3     | 0     | 1     | 0     | 0     | 1     | 0     | 4     | 2     | 2     | 1     | 1     | 0     | 0     | 0     | 0     | 0     | 0     |
| Mean ventricle dose (cGy)   | 699   | 1115  | 532   | 247   | 20    | 190   | 486   | 422   | 696   | 578   | 597   | 1043  | 604   | 1112  | 117   | 2     | 35    | 59    | 40    | 77    |
| Max ventricle dose (cGy)    | 4500  | 5280  | 5142  | 5070  | 4940  | 5160  | 4951  | 5128  | 4655  | 5215  | 5170  | 5120  | 5170  | 5111  | 625   | 23    | 243   | 255   | 159   | 332   |
| V5-Ventricle (cGy)          | 57    | 77    | 22    | 8     | 25    | 4     | 18    | 15    | 22    | 17    | 19    | 39    | 33    | 70    | 0     | 0     | 0     | 0     | 0     | 0     |
| V10-Ventricle (cGy)         | 18    | 42    | 12    | 6     | 11    | 2     | 11    | 10    | 16    | 10    | 14    | 30    | 14    | 55    | 0     | 0     | 0     | 0     | 0     | 0     |
| V25-Ventricle (cGy)         | 2     | 9     | 6     | 3     | 3     | 1     | 5     | 5     | 12    | 7     | 8     | 15    | 5     | 8     | 0     | 0     | 0     | 0     | 0     | 0     |
| V45-Ventricle (cGy)         | 0     | 2     | 2     | 1     | 1     | 0     | 1     | 1     | 0     | 3     | 2     | 3     | 1     | 1     | 0     | 0     | 0     | 0     | 0     | 0     |
| LVEF (%)                    | 72.4  | 52.1  | 76.9  | 54.0  | 72.9  | 56.2  | 67.2  | 64.2  | 63.8  | 57.2  | 69.3  | 57.2  | 59.3  | 63.9  | 62.2  | 71.3  | 74.5  | 55.5  | 60.8  | 55.7  |
| RVEF (%)                    | 59.4  | 53.7  | 61.8  | 47.1  | 59.2  | 49.1  | 53.9  | 54.0  | 61.4  | 65.5  | 62.4  | 66.1  | 53.7  | 63.9  | 60.3  | 55.1  | 58.1  | 59.9  | 63.8  | 53.8  |
| LVEDV (ml)                  | 120.2 | 85.1  | 100.9 | 109.0 | 104.1 | 89.1  | 111.5 | 115.0 | 133.7 | 129.1 | 146.6 | 123.9 | 121.3 | 98.1  | 97.3  | 143.4 | 121.5 | 123.9 | 114.8 | 123.4 |
| LVEDVI (ml/m <sup>2</sup> ) | 61.0  | 47.1  | 54.5  | 61.8  | 54.9  | 45.9  | 55.9  | 65.6  | 71.9  | 74.1  | 65.7  | 67.3  | 67.7  |       | 57.9  | 82.9  | 56.4  | 70.3  | 65.7  | 62.5  |
| LVESV (ml)                  | 33.2  | 40.8  | 23.4  | 50.0  | 28.2  | 39.0  | 36.6  | 41.1  | 48.4  | 55.3  | 44.9  | 53.1  | 49.4  | 35.4  | 36.8  | 41.1  | 30.9  | 55.1  | 45.0  | 54.7  |
| LVESVI (ml/m <sup>2</sup> ) | 16.8  | 22.6  | 12.6  | 28.4  | 14.9  | 20.1  | 18.4  | 23.5  | 26.1  | 31.7  | 20.1  | 28.9  | 27.6  |       | 21.9  | 23.8  | 14.4  | 31.3  | 25.8  | 27.7  |
| LV Mass (g)                 | 96.5  | 83.9  | 77.6  | 99.2  | 72.6  | 62.5  | 86.2  | 79.7  | 103.5 | 85.4  | 120.2 | 95.0  | 90.1  | 66.3  | 70.4  | 79.0  | 108.1 | 69.8  | 66.6  | 79.8  |
| LVMI (g/m <sup>2</sup> )    | 49.0  | 46.4  | 41.9  | 56.2  | 38.3  | 32.2  | 43.3  | 45.5  | 55.7  | 49.0  | 53.8  | 51.6  | 50.3  |       | 41.8  | 45.7  | 50.2  | 39.6  | 38.1  | 40.4  |
| RVEDV (ml)                  | 90.8  | 76.1  | 99.5  | 101.6 | 90.6  | 103.2 | 148.5 | 84.4  | 105.5 | 113.1 | 132.2 | 73.3  | 104.1 | 81.3  | 65.4  | 119.2 | 136.5 | 128.3 | 87.4  | 107.7 |
| RVEDVI (ml/m <sup>2</sup> ) | 46.1  | 42.1  | 53.8  | 57.6  | 47.8  | 53.2  | 74.5  | 48.1  | 56.8  | 64.8  | 59.2  | 39.8  | 58.1  |       | 38.9  | 69.0  | 63.3  | 72.8  | 50.0  | 54.6  |
| RVESV (ml)                  | 36.9  | 35.2  | 38.0  | 53.7  | 37.0  | 52.6  | 68.4  | 38.8  | 40.7  | 39.1  | 49.7  | 24.8  | 48.3  | 29.3  | 25.9  | 53.5  | 57.2  | 51.5  | 31.6  | 49.7  |
| RVESVI (ml/m <sup>2</sup> ) | 18.7  | 19.5  | 20.5  | 30.5  | 19.5  | 27.1  | 34.3  | 22.1  | 21.9  | 22.4  | 22.3  | 26.3  | 26.9  |       | 15.4  | 30.9  | 26.6  | 29.2  | 18.1  | 29.4  |
| GLS (%)                     | -13.9 | -11.1 | -14.6 | -14.6 | -14.1 | -13.4 | -13.2 | -13.7 | -15.4 | -16.2 | -16.5 | -14.2 | -14.4 | -14.4 | -14.5 | -14.7 | -17.8 | -12.9 | -15.6 | -15.9 |
| Total ECV (%)               | 27.1  | 23.2  | 23.5  | 27.3  | 28.4  | 26.2  | 31.2  | 25.1  | 23.2  | 27.7  | 26.5  | 28.9  | 27.8  | 27.4  | 28.2  | 28.5  | 24.0  | 33.7  | 29.3  | 33.7  |

Abbreviations: LVEF, left ventricular ejection fraction; RVEF, right ventricular ejection fraction; LVEDV, left ventricular end-diastolic volume; LVEDVI, left ventricular end-diastolic volume index; LVESV, left ventricular end-systolic volume; LVESVI, left ventricular end-systolic volume index; LVM, left ventricular mass; LVMI, left ventricular mass index; RVEDV, right ventricular end-diastolic volume; RVEDVI, right ventricular end-diastolic volume index; RVESV, right ventricular end-systolic volume; RVESVI, right ventricular end-systolic volume index; GLS, global longitudinal strain; ECV, extracellular volume fraction.
